# Supplementary material
Source: publisher figshare collection journal article supplement (https://sage.figshare.com/ndownloader/files/26578240)
Supplement: Supplementary file 1 [file 26578240]

Archive with 6 entries (6 files):
- coi_disclosure3.pdf
- coi_disclosure5.pdf
- coi_disclosure6.pdf
- coi_disclosure1.pdf
- coi_disclosure4.pdf
- coi_disclosure2.pdf
